# Supplementary material for: Potential Therapeutic Effects of Long-Term Stem Cell Administration: Impact on the Gene Profile and Kidney Function of PKD/Mhm (Cy/+) Rats
Source: MDPI journal article supplement (doi:10.3390/jcm11092601), 2022-05-05
Supplement: s1 [file s1]

**Table S1.** Changes in plasma biochemistry in PKD/Mhm (Cy/+) groups (n=6 in each group).

Comparison between A) ABCB5<sup>+</sup> derived CoCM<sup>+</sup>; i.p. ABCB5<sup>+</sup>; i.v. ABCB5<sup>+</sup> and untreated groups; B) ASC derived CM; i.p. ASC; i.v. ASC and untreated groups.

Data are shown as mean  $\pm$  Std.Dev. Values significantly different from control are indicated as \* $p < 0.05$ , \*\* $p < 0.005$ .

| A | Parameter                   | Animal group                                  | Baseline        | Day25                            | Day 53                           | Day 81           | Day 109                             | Day 137                          | Day 167                            |
|---|-----------------------------|-----------------------------------------------|-----------------|----------------------------------|----------------------------------|------------------|-------------------------------------|----------------------------------|------------------------------------|
|   | Creatinine<br>(mg/dl)       | Untreated                                     | 0.3 $\pm$ 0.1   | 0.4 $\pm$ 0.1                    | 0.6 $\pm$ 0.1                    | 0.6 $\pm$ 0.2    | 0.6 $\pm$ 0.1                       | 0.7 $\pm$ 0.1                    | 0.7 $\pm$ 0.1                      |
|   |                             | +ABCB5 <sup>+</sup> derived CoCM <sup>+</sup> | 0.3 $\pm$ 0.1   | 0.5 $\pm$ 0.2                    | 0.5 $\pm$ 0.1                    | 0.5 $\pm$ 0.1    | 0.7 $\pm$ 0.2                       | 0.6 $\pm$ 0.1                    | 0.7 $\pm$ 0.2                      |
|   |                             | + i.p. ABCB5 <sup>+</sup>                     | 0.3 $\pm$ 0.1   | 0.5 $\pm$ 0.1                    | 0.5 $\pm$ 0.1                    | 0.5 $\pm$ 0.1    | 0.6 $\pm$ 0.1                       | 0.6 $\pm$ 0.1                    | 0.6 $\pm$ 0.1                      |
|   |                             | + i.v. ABCB5 <sup>+</sup>                     | 0.3 $\pm$ 0.1   | 0.4 $\pm$ 0.1                    | 0.4 $\pm$ 0.1                    | 0.5 $\pm$ 0.2    | 0.5 $\pm$ 0.1                       | 0.5 $\pm$ 0.1                    | 0.7 $\pm$ 0.1                      |
|   | Urea<br>(mg/dl)             | Untreated                                     | 68.4 $\pm$ 18.2 | 69.4 $\pm$ 9.9                   | 73.9 $\pm$ 8.6                   | 88.4 $\pm$ 11.7  | 85.6 $\pm$ 8.1                      | 85.1 $\pm$ 13.0                  | 87.4 $\pm$ 11.0                    |
|   |                             | +ABCB5 <sup>+</sup> derived CoCM <sup>+</sup> | 57.5 $\pm$ 17.6 | 68.2 $\pm$ 19.9                  | 80.5 $\pm$ 15.6                  | 73.9 $\pm$ 20.8  | 74.8 $\pm$ 17.2                     | 83.7 $\pm$ 20.9                  | 86.5 $\pm$ 23.2                    |
|   |                             | + i.p. ABCB5 <sup>+</sup>                     | 56.1 $\pm$ 10.4 | 66.6 $\pm$ 19.2                  | 67.2 $\pm$ 14.7                  | 68.9 $\pm$ 17.7  | 75.3 $\pm$ 16.0                     | 74.9 $\pm$ 17.0                  | 79.6 $\pm$ 17.7                    |
|   |                             | + i.v. ABCB5 <sup>+</sup>                     | 52.2 $\pm$ 16.2 | 55.3 $\pm$ 17.6                  | 59.3 $\pm$ 15.6                  | 65.0 $\pm$ 20.2  | 63.9 $\pm$ 18.6                     | 66.8 $\pm$ 23.6                  | 72.3 $\pm$ 12.4                    |
|   | Na<br>(mmol/l)              | Untreated                                     | 144.3 $\pm$ 0.8 | 143.0 $\pm$ 3.6                  | 142.3 $\pm$ 6.9                  | 141.3 $\pm$ 2.3  | 144.3 $\pm$ 2.3                     | 141.8 $\pm$ 1.7                  | 144.8 $\pm$ 1.9                    |
|   |                             | +ABCB5 <sup>+</sup> derived CoCM <sup>+</sup> | 141.2 $\pm$ 2.9 | 144.3 $\pm$ 3.6                  | 144.0 $\pm$ 2.8                  | 142.5 $\pm$ 3.1  | 144.3 $\pm$ 1.0                     | 142.3 $\pm$ 3.2                  | 142.2 $\pm$ 1.7                    |
|   |                             | + i.p. ABCB5 <sup>+</sup>                     | 143.3 $\pm$ 1.6 | 142.7 $\pm$ 2.3                  | 144.3 $\pm$ 2.4                  | 143.3 $\pm$ 3.2  | 144.3 $\pm$ 1.4                     | 143.7 $\pm$ 2.5                  | <b>141.9 <math>\pm</math> 1.6*</b> |
|   |                             | + i.v. ABCB5 <sup>+</sup>                     | 141.6 $\pm$ 2.2 | 142.7 $\pm$ 2.0                  | 143.7 $\pm$ 2.8                  | 143.1 $\pm$ 2.3  | 143.7 $\pm$ 1.3                     | 143.0 $\pm$ 2.6                  | <b>142.0 <math>\pm</math> 2.0*</b> |
|   | K<br>(mmol/l)               | Untreated                                     | 5.4 $\pm$ 0.3   | 5.1 $\pm$ 0.6                    | 5.2 $\pm$ 0.7                    | 5.3 $\pm$ 0.4    | 5.3 $\pm$ 0.2                       | 5.7 $\pm$ 0.4                    | 5.1 $\pm$ 0.2                      |
|   |                             | +ABCB5 <sup>+</sup> derived CoCM <sup>+</sup> | 5.2 $\pm$ 0.2   | 5.0 $\pm$ 0.2                    | 5.0 $\pm$ 0.3                    | 5.1 $\pm$ 0.4    | 4.9 $\pm$ 0.3                       | 5.2 $\pm$ 0.3                    | 5.3 $\pm$ 0.4                      |
|   |                             | + i.p. ABCB5 <sup>+</sup>                     | 5.3 $\pm$ 0.3   | 4.8 $\pm$ 0.1                    | 5.0 $\pm$ 0.2                    | 5.3 $\pm$ 0.6    | <b>5.2 <math>\pm</math> 0.2*</b>    | <b>5.1 <math>\pm</math> 0.3*</b> | 4.9 $\pm$ 0.2                      |
|   |                             | + i.v. ABCB5 <sup>+</sup>                     | 5.2 $\pm$ 0.2   | 4.8 $\pm$ 0.2                    | 4.9 $\pm$ 0.2                    | 5.2 $\pm$ 0.3    | 4.9 $\pm$ 0.3                       | <b>5.1 <math>\pm</math> 0.3*</b> | 5.0 $\pm$ 0.2                      |
|   | Ca<br>(mmol/l)              | Untreated                                     | 2.5 $\pm$ 0.2   | 2.6 $\pm$ 0.0                    | 2.6 $\pm$ 0.1                    | 2.6 $\pm$ 0.1    | 2.6 $\pm$ 0.0                       | 2.6 $\pm$ 0.1                    | 2.7 $\pm$ 0.1                      |
|   |                             | +ABCB5 <sup>+</sup> derived CoCM <sup>+</sup> | 2.6 $\pm$ 0.1   | 2.6 $\pm$ 0.1                    | 2.5 $\pm$ 0.1                    | 5.5 $\pm$ 7.3    | <b>2.6 <math>\pm</math> 0.0*</b>    | 2.6 $\pm$ 0.1                    | 2.4 $\pm$ 0.2                      |
|   |                             | + i.p. ABCB5 <sup>+</sup>                     | 2.5 $\pm$ 0.1   | <b>2.5 <math>\pm</math> 0.1*</b> | 2.5 $\pm$ 0.2                    | 2.5 $\pm$ 0.2    | <b>2.5 <math>\pm</math> 0.1**</b>   | 2.7 $\pm$ 0.0                    | <b>2.4 <math>\pm</math> 0.2*</b>   |
|   |                             | + i.v. ABCB5 <sup>+</sup>                     | 2.5 $\pm$ 0.2   | 2.5 $\pm$ 0.1                    | 2.5 $\pm$ 0.2                    | 2.4 $\pm$ 0.3    | 2.6 $\pm$ 0.1                       | 2.7 $\pm$ 0.5                    | 2.5 $\pm$ 0.2                      |
|   | PO <sub>4</sub><br>(mmol/l) | Untreated                                     | 2.4 $\pm$ 0.5   | 2.2 $\pm$ 0.1                    | 2.6 $\pm$ 0.2                    | 2.1 $\pm$ 0.6    | 2.0 $\pm$ 0.3                       | 2.1 $\pm$ 0.2                    | 2.1 $\pm$ 0.3                      |
|   |                             | +ABCB5 <sup>+</sup> derived CoCM <sup>+</sup> | 2.6 $\pm$ 0.3   | 2.5 $\pm$ 0.1                    | 2.4 $\pm$ 0.2                    | 2.3 $\pm$ 0.2    | 2.1 $\pm$ 0.2                       | 2.1 $\pm$ 0.2                    | 2.2 $\pm$ 0.2                      |
|   |                             | + i.p. ABCB5 <sup>+</sup>                     | 2.7 $\pm$ 0.2   | 2.5 $\pm$ 0.1                    | <b>2.5 <math>\pm</math> 0.1*</b> | 2.1 $\pm$ 0.2    | 2.1 $\pm$ 0.2                       | 2.1 $\pm$ 0.1                    | 2.1 $\pm$ 0.1                      |
|   |                             | + i.v. ABCB5 <sup>+</sup>                     | 2.5 $\pm$ 0.3   | 2.4 $\pm$ 0.2                    | 2.3 $\pm$ 0.1                    | 2.2 $\pm$ 0.2    | 2.1 $\pm$ 0.2                       | 2.0 $\pm$ 0.1                    | 1.9 $\pm$ 0.2                      |
|   | Cholesterol<br>(mg/dl)      | Untreated                                     | 97.3 $\pm$ 7.5  | 99.7 $\pm$ 6.7                   | 110.0 $\pm$ 9.1                  | 107.5 $\pm$ 8.5  | 131.7 $\pm$ 10.0                    | 131.7 $\pm$ 10.2                 | 154.3 $\pm$ 15.5                   |
|   |                             | +ABCB5 <sup>+</sup> derived CoCM <sup>+</sup> | 89.7 $\pm$ 5.9  | 117.4 $\pm$ 39.0                 | 102.3 $\pm$ 9.7                  | 102.7 $\pm$ 18.6 | 110.5 $\pm$ 22.3                    | 121.5 $\pm$ 16.7                 | 138.3 $\pm$ 30.9                   |
|   |                             | + i.p. ABCB5 <sup>+</sup>                     | 88.3 $\pm$ 4.6  | 101.3 $\pm$ 25.8                 | 102.7 $\pm$ 12.5                 | 97.7 $\pm$ 10.9  | <b>100.3 <math>\pm</math> 12.6*</b> | 116.0 $\pm$ 14.2                 | 135.1 $\pm$ 23.0                   |
|   |                             | + i.v. ABCB5 <sup>+</sup>                     | 88.6 $\pm$ 6.9  | 105.9 $\pm$ 37.4                 | 94.0 $\pm$ 14.6                  | 100.9 $\pm$ 22.7 | <b>104.4 <math>\pm</math> 17.0*</b> | 109.9 $\pm$ 18.7                 | 134.0 $\pm$ 29.3                   |
|   | Triglycerides<br>(mg/dl)    | Untreated                                     | 69.2 $\pm$ 26.3 | 54.3 $\pm$ 14.5                  | 67.2 $\pm$ 19.4                  | 91.5 $\pm$ 21.6  | 68.7 $\pm$ 10.0                     | 60.2 $\pm$ 15.0                  | 108.8 $\pm$ 48.3                   |
|   |                             | +ABCB5 <sup>+</sup> derived CoCM <sup>+</sup> | 75.7 $\pm$ 34.5 | 49.8 $\pm$ 19.2                  | 44.3 $\pm$ 16.0                  | 53.3 $\pm$ 24.6  | 60.7 $\pm$ 22.9                     | 71.7 $\pm$ 32.0                  | 69.8 $\pm$ 23.4                    |
|   |                             | + i.p. ABCB5 <sup>+</sup>                     | 77.7 $\pm$ 29.8 | 37.1 $\pm$ 7.8                   | 49.0 $\pm$ 14.4                  | 53.9 $\pm$ 23.3  | 72.7 $\pm$ 42.7                     | 69.0 $\pm$ 28.0                  | 79.3 $\pm$ 29.0                    |

|                           |             |            |             |             |             |             |             |
|---------------------------|-------------|------------|-------------|-------------|-------------|-------------|-------------|
| + i.v. ABCB5 <sup>+</sup> | 70.9 ± 30.7 | 52.0 ± 5.6 | 50.0 ± 13.2 | 56.9 ± 20.0 | 72.7 ± 34.3 | 72.9 ± 30.4 | 72.1 ± 29.6 |
|---------------------------|-------------|------------|-------------|-------------|-------------|-------------|-------------|

| B | Parameter       | Animal group     | Baseline    | Day25       | Day 53       | Day 81       | Day 109      | Day 137      | Day 167             |
|---|-----------------|------------------|-------------|-------------|--------------|--------------|--------------|--------------|---------------------|
|   | Creatinine      | Untreated        | 0.3 ± 0.1   | 0.4 ± 0.1   | 0.6 ± 0.1    | 0.6 ± 0.2    | 0.6 ± 0.1    | 0.7 ± 0.1    | 0.7 ± 0.1           |
|   | (mg/dl)         | + ASC derived CM | 0.3 ± 0.1   | 0.5 ± 0.1   | 0.7 ± 0.1    | 0.7 ± 0.1    | 0.7 ± 0.0    | 0.7 ± 0.1    | 0.7 ± 0.2           |
|   |                 | + i.p. ASC       | 0.3 ± 0.0   | 0.5 ± 0.1   | 0.5 ± 0.1    | 0.5 ± 0.1    | 0.5 ± 0.1*   | 0.6 ± 0.1    | 0.6 ± 0.1           |
|   |                 | + i.v. ASC       | 0.3 ± 0.0   | 0.5 ± 0.1   | 0.6 ± 0.0    | 0.7 ± 0.1    | 0.6 ± 0.0    | 0.7 ± 0.1    | 0.7 ± 0.1           |
|   | Urea            | Untreated        | 68.4 ± 18.2 | 69.4 ± 9.9  | 73.9 ± 8.6   | 88.4 ± 11.7  | 85.6 ± 8.1   | 85.1 ± 13.0  | 87.4 ± 11.0         |
|   | (mg/dl)         | + ASC derived CM | 67.9 ± 8.2  | 11.8 ± 13.4 | 93.3 ± 7.3   | 97.6 ± 7.8   | 94.4 ± 7.0   | 96.4 ± 8.2   | 98.7 ± 21.6         |
|   |                 | + i.p. ASC       | 66.0 ± 8.9  | 74.7 ± 10.7 | 84.5 ± 7.8   | 80.8 ± 11.7  | 81.1 ± 11.5  | 79.2 ± 9.7   | 90.8 ± 12.7         |
|   |                 | + i.v. ASC       | 63.9 ± 3.6  | 80.1 ± 7.0  | 91.3 ± 7.4   | 88.9 ± 12.3  | 86.8 ± 6.2   | 90.9 ± 6.5   | 95.6 ± 10.6         |
|   | Na              | Untreated        | 144.3 ± 0.8 | 143.0 ± 3.6 | 142.3 ± 6.9  | 141.3 ± 2.3  | 144.3 ± 2.3  | 141.8 ± 1.7  | 144.8 ± 1.9         |
|   | (mmol/l)        | + ASC derived CM | 144.8 ± 4.0 | 140.0 ± 3.6 | 138.6 ± 2.6  | 140.5 ± 2.5  | 143.0 ± 2.9  | 145.0 ± 2.7  | 145.3 ± 2.2         |
|   |                 | + i.p. ASC       | 143.2 ± 2.1 | 141.4 ± 4.9 | 139.8 ± 3.3  | 145.3 ± 5.1  | 144.7 ± 1.9  | 144.3 ± 0.8  | <b>138.5 ± 5.0*</b> |
|   |                 | + i.v. ASC       | 144.0 ± 2.1 | 144.7 ± 3.5 | 140.0 ± 3.7  | 144.0 ± 6.5  | 143.8 ± 2.8  | 143.0 ± 0.9  | 139.5 ± 4.4         |
|   | K               | Untreated        | 5.4 ± 0.2   | 5.1 ± 0.6   | 5.2 ± 0.7    | 5.3 ± 0.4    | 5.3 ± 0.2    | 5.7 ± 0.4    | 5.1 ± 0.2           |
|   | (mmol/l)        | + ASC derived CM | 6.0 ± 1.8   | 5.2 ± 0.5   | 5.2 ± 0.3    | 5.4 ± 0.4    | 5.3 ± 0.5    | 5.2 ± 0.4    | 5.7 ± 0.4           |
|   |                 | + i.p. ASC       | 5.0 ± 0.3   | 5.4 ± 0.9   | 5.4 ± 0.3    | 5.3 ± 0.4    | 5.2 ± 0.2    | 5.2 ± 0.3    | <b>6.1 ± 0.5**</b>  |
|   |                 | + i.v. ASC       | 5.0 ± 0.4   | 5.9 ± 0.6   | 5.3 ± 0.5    | 5.2 ± 0.3    | 5.2 ± 0.4    | 5.0 ± 0.5    | 5.7 ± 0.4           |
|   | Ca              | Untreated        | 2.5 ± 0.2   | 2.6 ± 0.0   | 2.6 ± 0.1    | 2.6 ± 0.1    | 2.6 ± 0.0    | 2.6 ± 0.1    | 2.9 ± 0.1           |
|   | (mmol/l)        | + ASC derived CM | 1.5 ± 0.2   | 2.6 ± 0.1   | 2.6 ± 0.0    | 2.5 ± 0.1    | 2.6 ± 0.1    | 2.6 ± 0.1    | 2.7 ± 0.1           |
|   |                 | + i.p. ASC       | 2.6 ± 0.1   | 2.6 ± 0.1   | 2.6 ± 0.1    | 2.6 ± 0.1    | 2.6 ± 0.1    | 2.6 ± 0.1    | 2.6 ± 0.1           |
|   |                 | + i.v. ASC       | 2.7 ± 0.1   | 2.6 ± 0.1   | 2.5 ± 0.1    | 2.6 ± 0.0    | 2.6 ± 0.1    | 2.6 ± 0.1    | 2.6 ± 0.1           |
|   | PO <sub>4</sub> | Untreated        | 2.4 ± 0.5   | 2.2 ± 0.1   | 2.6 ± 0.2    | 2.1 ± 0.4    | 2.0 ± 0.3    | 2.1 ± 0.2    | 2.1 ± 0.3           |
|   | (mmol/l)        | + ASC derived CM | 2.5 ± 0.3   | 2.4 ± 0.2   | 2.3 ± 0.1    | 2.3 ± 0.1    | 2.3 ± 0.1    | 2.2 ± 0.2    | 2.0 ± 0.4           |
|   |                 | + i.p. ASC       | 2.6 ± 0.3   | 2.7 ± 0.3   | 2.3 ± 0.3    | 2.2 ± 0.1    | 2.1 ± 0.1    | 2.2 ± 0.1    | 1.8 ± 0.3           |
|   |                 | + i.v. ASC       | 2.7 ± 0.2   | 2.5 ± 0.4   | 2.2 ± 0.3    | 2.3 ± 0.1    | 2.2 ± 0.1    | 2.3 ± 0.2    | 1.9 ± 0.2           |
|   | Cholesterol     | Untreated        | 97.3 ± 7.5  | 99.7 ± 6.7  | 110.0 ± 9.1  | 107.5 ± 8.5  | 131.7 ± 10.0 | 131.7 ± 10.2 | 154.3 ± 15.5        |
|   | (mg/dl)         | + ASC derived CM | 99.8 ± 7.6  | 100.3 ± 9.7 | 107.4 ± 13.7 | 117.8 ± 12.8 | 127.0 ± 17.9 | 138.3 ± 23.4 | 152.3 ± 22.0        |
|   |                 | + i.p. ASC       | 95.8 ± 6.5  | 96.2 ± 7.8  | 100.5 ± 7.3  | 111.0 ± 5.4  | 111.0 ± 8.5  | 134.3 ± 5.7  | 144.7 ± 10.6        |
|   |                 | + i.v. ASC       | 97.0 ± 8.5  | 103.3 ± 5.1 | 99.7 ± 6.3   | 116.5 ± 8.4  | 119.0 ± 6.5  | 139.0 ± 13.1 | 149.5 ± 17.3        |
|   | Triglycerides   | Untreated        | 69.2 ± 26.3 | 54.3 ± 14.5 | 67.2 ± 19.4  | 91.5 ± 21.6  | 68.7 ± 10.0  | 60.2 ± 15.0  | 108.8 ± 48.3        |
|   | (mg/dl)         | + ASC derived CM | 78.5 ± 14.5 | 82.5 ± 27.0 | 62.8 ± 28.2  | 81.3 ± 31.3  | 66.0 ± 7.0   | 80.8 ± 21.9  | 63.3 ± 36.2         |
|   |                 | + i.p. ASC       | 76.5 ± 17.8 | 77.0 ± 22.8 | 64.5 ± 23.1  | 99.0 ± 43.2  | 72.0 ± 16.6  | 78.0 ± 14.2  | 98.8 ± 42.2         |
|   |                 | + i.v. ASC       | 94.7 ± 28.1 | 93.0 ± 16.6 | 70.3 ± 15.0  | 70.7 ± 15.0  | 10.2 ± 30.7  | 85.7 ± 27.0  | 63.5 ± 17.2         |

**Table S2.** Changes of ABZWCY-H $\beta$ CD half-life in PKD/Mhm (Cy/+) groups (n=6).

Comparison between ABCB5<sup>+</sup> derived CoCM<sup>+</sup>, i.v. or i.p. ABCB5<sup>+</sup> groups and untreated. Data are shown as mean  $\pm$  Std.Dev. Values significantly different from control are indicated as \* $p < 0.05$ .

| A | Parameter              | Animal group                                  | Baseline       | Day25           | Day 53          | Day 81          | Day 109         | Day 137         | Day 167                            |
|---|------------------------|-----------------------------------------------|----------------|-----------------|-----------------|-----------------|-----------------|-----------------|------------------------------------|
|   | ABZWCY-H $\beta$ CD    | Untreated                                     | 26.7 $\pm$ 9.3 | 30.6 $\pm$ 7.1  | 39.3 $\pm$ 11.3 | 42.3 $\pm$ 6.4  | 51.4 $\pm$ 16.8 | 60.7 $\pm$ 29.9 | 66.0 $\pm$ 11.4                    |
|   | t <sub>1/2</sub> (min) | +ABCB5 <sup>+</sup> derived CoCM <sup>+</sup> | 24.0 $\pm$ 7.6 | 24.9 $\pm$ 5.6  | 53.3 $\pm$ 28.5 | 47.2 $\pm$ 15.1 | 52.0 $\pm$ 22.7 | 47.1 $\pm$ 25.8 | 55.0 $\pm$ 12.0                    |
|   |                        | + i.p. ABCB5 <sup>+</sup>                     | 25.3 $\pm$ 9.8 | 31.7 $\pm$ 13.2 | 38.6 $\pm$ 10.7 | 43.6 $\pm$ 13.1 | 32.7 $\pm$ 8.6  | 39.0 $\pm$ 18.1 | <b>41.2 <math>\pm</math> 15.5*</b> |
|   |                        | + i.v. ABCB5 <sup>+</sup>                     | 23.8 $\pm$ 4.4 | 27.0 $\pm$ 9.5  | 32.5 $\pm$ 17.0 | 45.0 $\pm$ 15.3 | 35.2 $\pm$ 13.8 | 38.8 $\pm$ 11.1 | 43.9 $\pm$ 19.1                    |

  

| B | Parameter              | Animal group     | Baseline       | Day25            | Day 53          | Day 81          | Day 109         | Day 137         | Day 167                           |
|---|------------------------|------------------|----------------|------------------|-----------------|-----------------|-----------------|-----------------|-----------------------------------|
|   | ABZWCY-H $\beta$ CD    | Untreated        | 26.7 $\pm$ 9.3 | 30.6 $\pm$ 7.1   | 39.3 $\pm$ 11.3 | 42.3 $\pm$ 6.4  | 51.4 $\pm$ 16.8 | 60.7 $\pm$ 29.9 | 66.0 $\pm$ 11.4                   |
|   | t <sub>1/2</sub> (min) | + ASC derived CM | 26.8 $\pm$ 7.3 | 33.4 $\pm$ 11.9  | 38.5 $\pm$ 9.6  | 42.6 $\pm$ 9.1  | 43.0 $\pm$ 10.7 | 51.2 $\pm$ 16.8 | 49.6 $\pm$ 15.7                   |
|   |                        | + i.p. ASC       | 34.6 $\pm$ 5.7 | 28.3 $\pm$ 5.2   | 31.1 $\pm$ 8.8  | 40.8 $\pm$ 8.2  | 36.5 $\pm$ 9.6  | 39.3 $\pm$ 10.8 | <b>38.8 <math>\pm</math> 8.1*</b> |
|   |                        | + i.v. ASC       | 33.2 $\pm$ 7.3 | 40.28 $\pm$ 12.2 | 31.1 $\pm$ 10.1 | 49.9 $\pm$ 23.3 | 43.0 $\pm$ 16.8 | 54.0 $\pm$ 11.2 | 43.0 $\pm$ 19.8                   |

**Table S3.** Changes in urine protein and albumin concentration in PKD/Mhm (Cy/+) groups (n=6 in each group).

Comparison between A) ABCB5<sup>+</sup> derived CoCM<sup>+</sup>; i.p. ABCB5<sup>+</sup>; i.v. ABCB5<sup>+</sup> and untreated groups; B) ASC derived CM; i.p. ASC; i.v. ASC and untreated groups. Data are shown as mean  $\pm$  Std.Dev. Values significantly different from control are indicated as \* $p < 0.05$ .

| A | Parameter | Animal group                                  | Baseline       | Day25          | Day 53          | Day 81          | Day 109         | Day 137         | Day 167           |
|---|-----------|-----------------------------------------------|----------------|----------------|-----------------|-----------------|-----------------|-----------------|-------------------|
|   | Protein   | Untreated                                     | 10.6 $\pm$ 5.2 | 19.5 $\pm$ 5.2 | 27.7 $\pm$ 9.8  | 32.7 $\pm$ 4.6  | 61.4 $\pm$ 16.3 | 96.8 $\pm$ 26.5 | 154.5 $\pm$ 177.7 |
|   | (mg/16h)  | +ABCB5 <sup>+</sup> derived CoCM <sup>+</sup> | 12.1 $\pm$ 5.5 | 19.7 $\pm$ 6.8 | 25.4 $\pm$ 12.9 | 33.8 $\pm$ 12.2 | 41.9 $\pm$ 16.7 | 50.2 $\pm$ 20.6 | 49.8 $\pm$ 16.4   |
|   |           | + i.p. ABCB5 <sup>+</sup>                     | 12.2 $\pm$ 2.3 | 19.1 $\pm$ 5.2 | 30.2 $\pm$ 12.7 | 36.4 $\pm$ 13.1 | 47.5 $\pm$ 19.5 | 51.9 $\pm$ 22.6 | 68.4 $\pm$ 35.0   |

|          |                                               |            |            |             |             |             |                     |               |
|----------|-----------------------------------------------|------------|------------|-------------|-------------|-------------|---------------------|---------------|
|          | + i.v. ABCB5 <sup>+</sup>                     | 13.0 ± 3.5 | 20.3 ± 6.9 | 26.1 ± 10.2 | 34.4 ± 17.3 | 36.9 ± 19.5 | <b>39.4 ± 25.6*</b> | 58.8 ± 36.5   |
| Albumin  | Untreated                                     | 2.3 ± 1.5  | 4.3 ± 1.7  | 12.4 ± 4.1  | 22.4 ± 11.4 | 27.4 ± 13.2 | 25.4 ± 11.3         | 103.9 ± 108.5 |
| (mg/16h) | +ABCB5 <sup>+</sup> derived CoCM <sup>+</sup> | 1.8 ± 1.1  | 4.5 ± 2.0  | 9.4 ± 4.5   | 15.9 ± 6.4  | 24.8 ± 13.1 | 32.5 ± 26.4         | 39.1 ± 16.2   |
|          | + i.p. ABCB5 <sup>+</sup>                     | 1.9 ± 0.9  | 8.6 ± 5.0  | 14.4 ± 12.1 | 21.4 ± 13.2 | 30.6 ± 24.7 | 38.9 ± 23.0         | 58.1 ± 37.5   |
|          | + i.v. ABCB5 <sup>+</sup>                     | 1.6 ± 1.5  | 5.5 ± 3.7  | 9.1 ± 6.6   | 14.3 ± 8.7  | 20.9 ± 15.1 | 26.5 ± 24.6         | 52.6 ± 37.7   |

| B | Parameter | Animal group     | Baseline   | Day25      | Day 53      | Day 81      | Day 109     | Day 137     | Day 167       |
|---|-----------|------------------|------------|------------|-------------|-------------|-------------|-------------|---------------|
|   | Protein   | Untreated        | 10.6 ± 5.2 | 19.5 ± 5.2 | 27.7 ± 9.8  | 32.7 ± 4.6  | 61.4 ± 16.3 | 96.8 ± 26.5 | 154.5 ± 177.7 |
|   | (mg/16h)  | + ASC derived CM | 11.1 ± 3.2 | 18.6 ± 5.0 | 21.8 ± 12.0 | 35.6 ± 15.0 | 53.3 ± 18.3 | 63.7 ± 17.9 | 81.3 ± 15.8   |
|   |           | + i.p. ASC       | 8.9 ± 3.2  | 18.8 ± 6.8 | 33.6 ± 5.6  | 38.6 ± 11.5 | 57.5 ± 15.7 | 66.2 ± 9.1  | 76.0 ± 41.1   |
|   |           | + i.v. ASC       | 10.6 ± 5.3 | 14.9 ± 3.8 | 33.1 ± 13.5 | 36.2 ± 8.7  | 70.8 ± 32.0 | 88.1 ± 21.6 | 83.6 ± 25.5   |
|   | Albumin   | Untreated        | 2.3 ± 1.5  | 4.3 ± 1.8  | 12.4 ± 4.1  | 22.4 ± 11.4 | 27.4 ± 13.2 | 25.4 ± 11.3 | 103.9 ± 108.5 |
|   | (mg/16h)  | + ASC derived CM | 2.2 ± 1.9  | 6.6 ± 4.1  | 7.3 ± 4.8   | 16.0 ± 7.2  | 18.3 ± 16.3 | 30.2 ± 12.7 | 39.0 ± 6.6    |
|   |           | + i.p. ASC       | 1.4 ± 0.9  | 4.7 ± 2.6  | 11.2 ± 6.2  | 18.0 ± 4.7  | 27.6 ± 17.2 | 31.0 ± 14.9 | 64.7 ± 34.6   |
|   |           | + i.v. ASC       | 0.7 ± 0.2  | 3.5 ± 1.2  | 10.2 ± 5.4  | 11.6 ± 5.3  | 33.3 ± 15.3 | 28.6 ± 18.7 | 60.4 ± 26.1   |
